# Supplementary material for: Salvage polatuzumab and allogeneic transplant rescue patients with B-cell lymphoma failing CAR T-cell therapy
Source: PubMed Central journal article supplement — Blood Adv. 2022 Nov 25;7(11):2463–7. doi: 10.1182/bloodadvances.2022009025 (PMC10241849; doi:10.1182/bloodadvances.2022009025), 2022-11-25
Supplement: BLOODA_ADV-2022-009025R1-mmc1.pdf [file BLOODA_ADV-2022-009025R1-mmc1.pdf]

# Progression Free Survival post Allogeneic Transplant

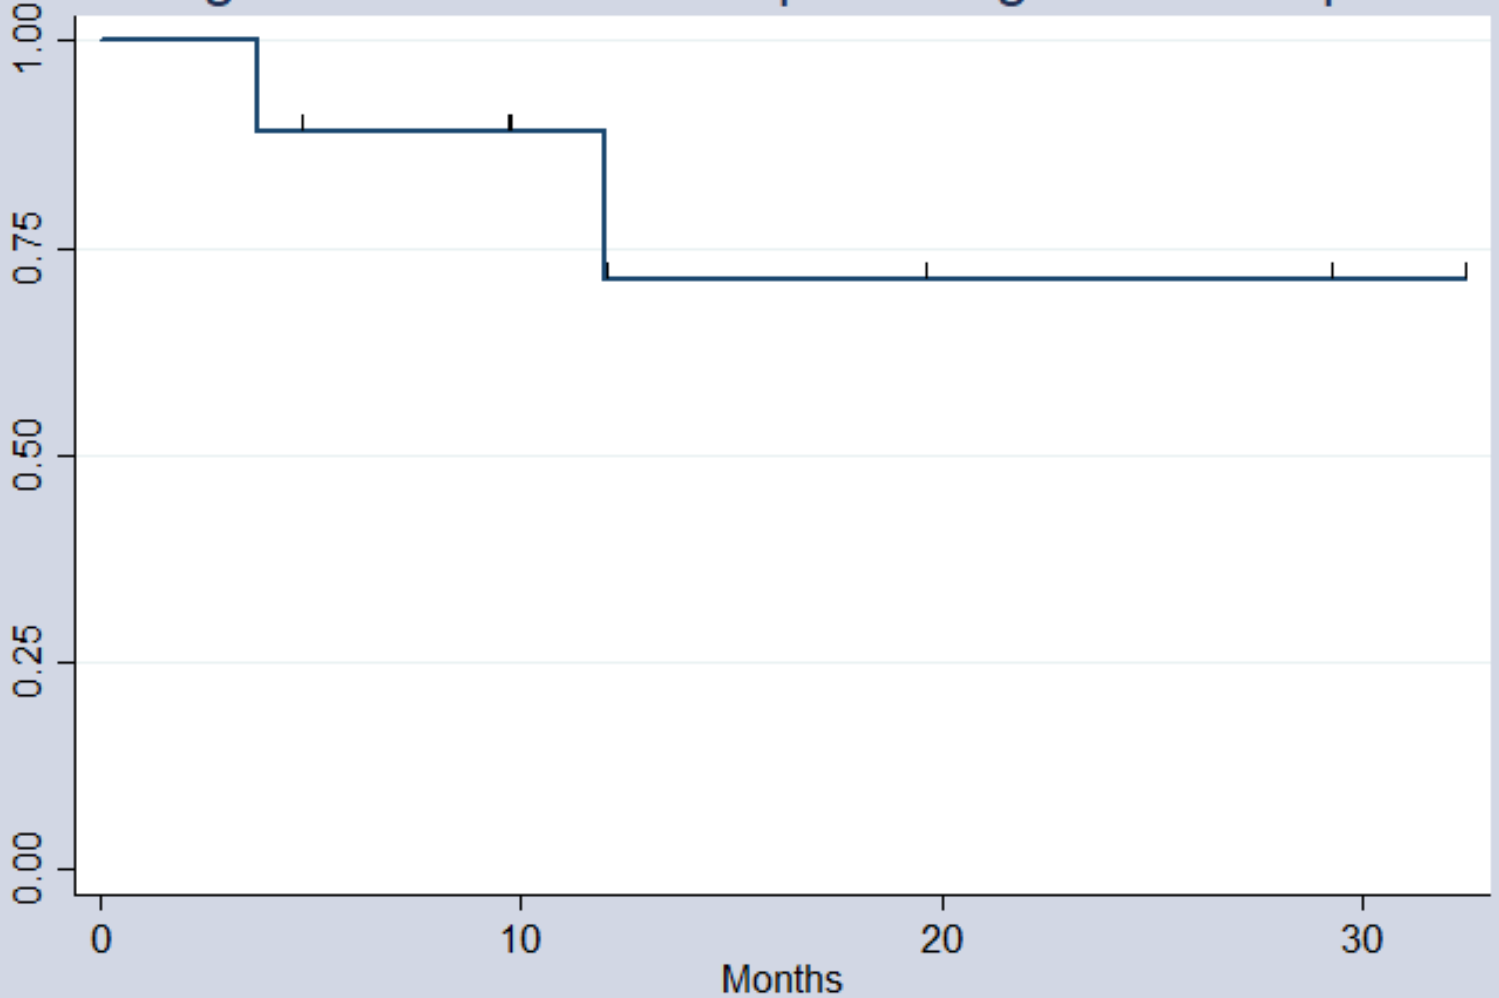

**Supplemental Figure 1:** Progression-free survival after Polatuzumab followed by Allogeneic Transplant

## Overall Survival post Allogeneic Transplant

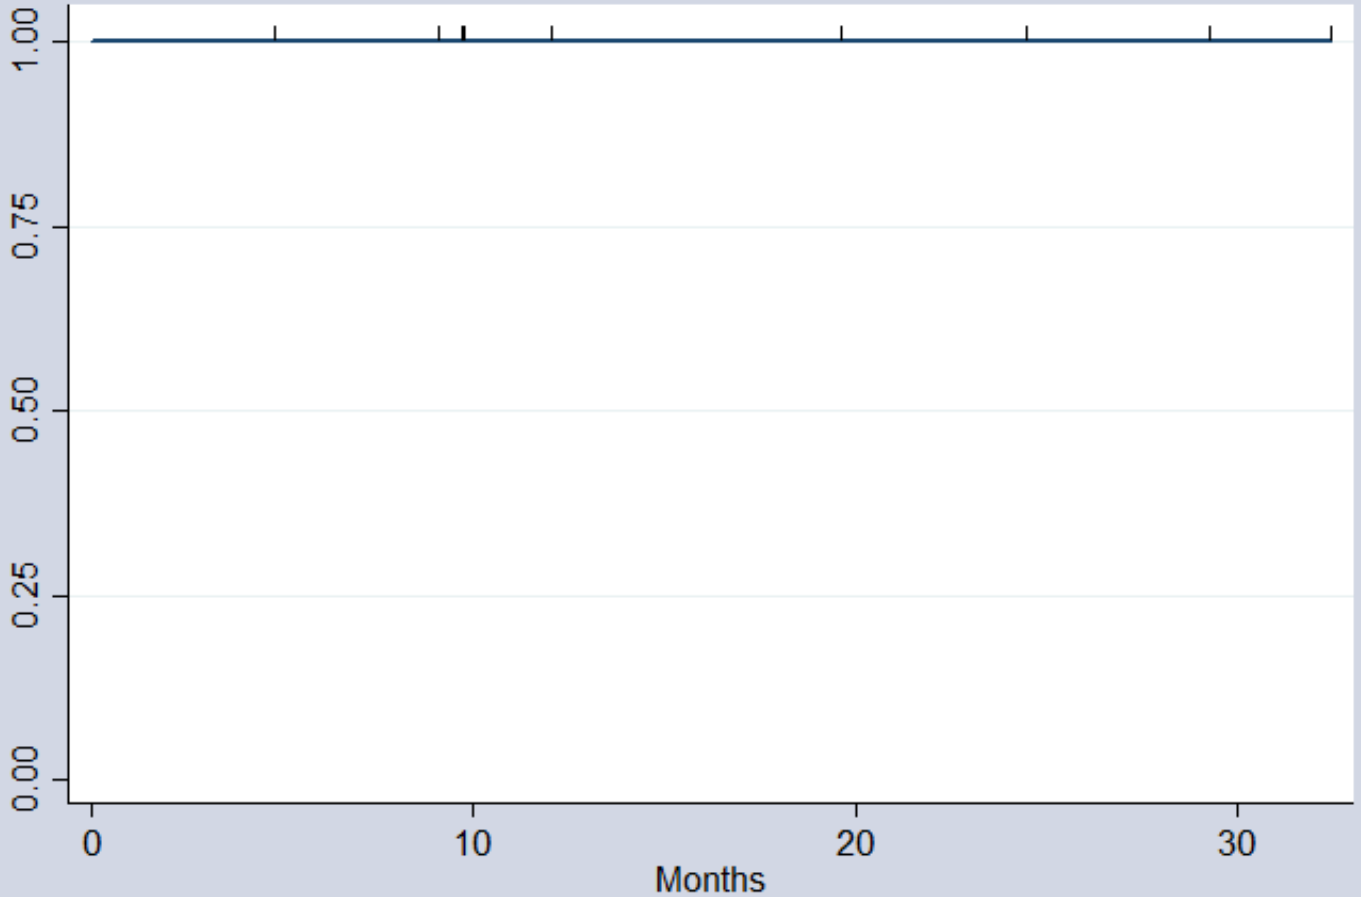

**Supplemental Figure 2:** Overall survival after Polatuzumab followed by Allogeneic Transplant
